# Supplementary material for: No-Code Platform-Based Deep-Learning Models for Prediction of Colorectal Polyp Histology from White-Light Endoscopy Images: Development and Performance Verification
Source: MDPI journal article supplement (doi:10.3390/jpm12060963), 2022-06-12

**Supplementary Figure S1.** Geographic location of hospitals where the training dataset and external-test datasets were collected.

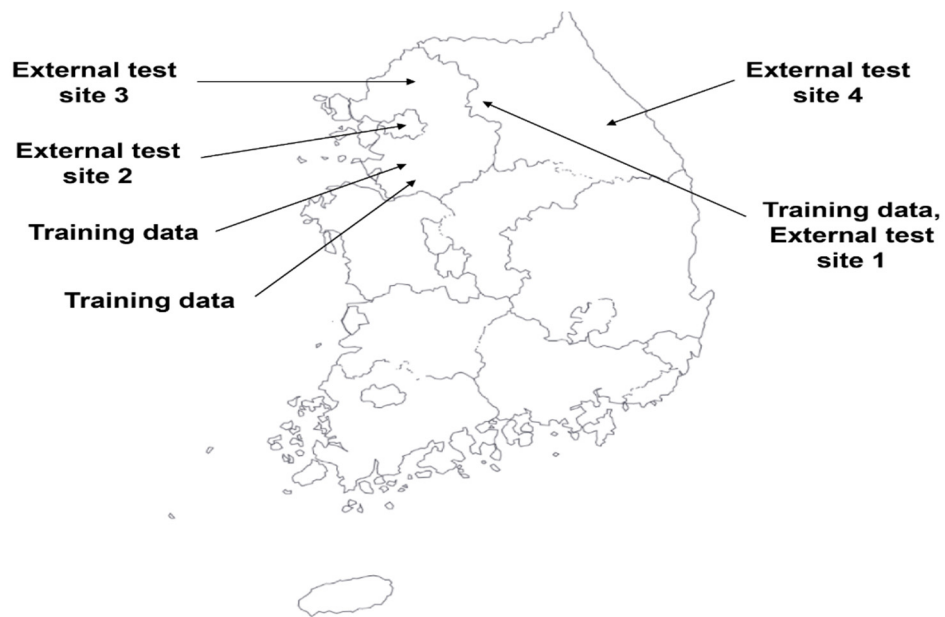

Supplement: s1 [file s1]
